# Supplementary material for: A Case Study of Chimeric Antigen Receptor T Cell Function: Donor Therapeutic Differences in Activity and Modulation with Verteporfin
Source: MDPI journal article supplement (doi:10.3390/cancers15041085), 2023-02-08
Supplement: s1 [file s1]

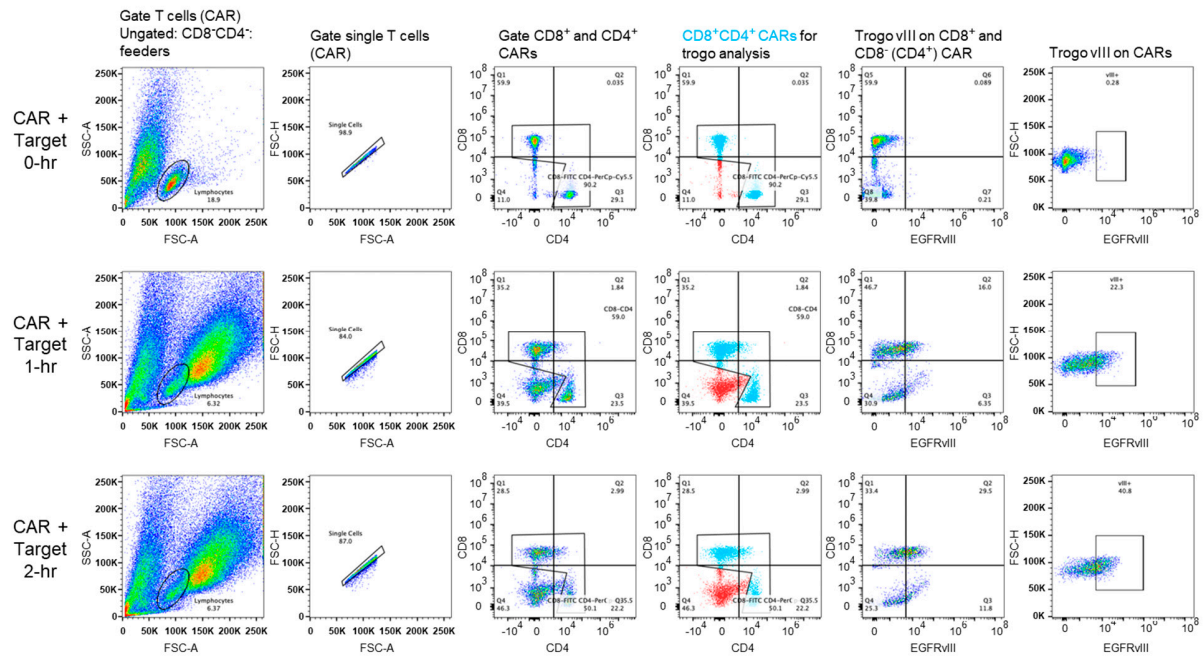

**Supplementary Figure S1: Gating strategy for detecting CAR T cells and acquisition of EGFRvIII (vIII) expression from target co-culture.** Representative flow cytometry analysis of Donor 1. Mixed CAR and target tumors (U87-EGFRvIII) were first defined based on forward (FSC) and side scatter (SSC). A secondary single cell CAR T cell gate was applied. CD4 and CD8 CAR T cell lineages were defined. Thereafter, the expression of EGFRvIII on CAR T cells was quantified.

**Supplementary Table S1**

Table listing the antibody name, tag, catalog number, and vendor used in all flow cytometry and western blot experiments.

| <b>Antibody</b>    | <b>Tag</b>      | <b>Cat#</b>  | <b>Vendor</b>                        | <b>Application</b> |
|--------------------|-----------------|--------------|--------------------------------------|--------------------|
| TIM3               | BV421           | 3545008      | BioLegend                            | Flow               |
| TIM3               | Alexa Fluor-488 | 54669        | Cell Signaling<br>Technologies (CST) | Flow               |
| PD-L1              | PE              | 12-5983-42   | ThermoFisher                         | Flow               |
| PD-L1              | APC             | 17-5983-42   | ThermoFisher                         | Flow               |
| Goat anti-Rabbit   | AF647-R-PE      | A20991       | ThermoFisher                         | Flow (secondary)   |
| CD14               | PE/Cy7          | 301814       | BioLegend                            | Flow               |
| CD3                | Pacific Blue    | 344824       | BioLegend                            | Flow               |
| CD4                | PerCP-Cy5-5     | 65-0047-T100 | TONBO Biosciences                    | Flow               |
| CD8                | BV605           | 344742       | BioLegend                            | Flow               |
| PD1                | APC             | 329908       | BioLegend                            | Flow               |
| PD1                | BV421           | 329920       | BioLegend                            | Flow               |
| CD57               | FITC            | 555-619      | BD Pharmingen                        | Flow               |
| LAG3               | BV650           | 369316       | BioLegend                            | Flow               |
| EGFRvIII           | NA              | V3980-100ug  | NSJ Bioreagents                      | Flow/WB (primary)  |
| Goat anti-Rabbit   | APC             | A10931       | ThermoFisher                         | Flow (secondary)   |
| PD-L1              | NA              | 13684S       | CST                                  | WB                 |
| Rabbit IgG isotype | NA              | 3900S        | CST                                  | Flow               |
| $\beta$ -Actin     | NA              | A1978        | Sigma-Aldrich                        | WB                 |
