# Supplementary material for: A Case Study of Chimeric Antigen Receptor T Cell Function: Donor Therapeutic Differences in Activity and Modulation with Verteporfin
Source: MDPI journal article supplement (doi:10.3390/cancers15041085), 2023-02-08
Supplement: s1 [file s1]

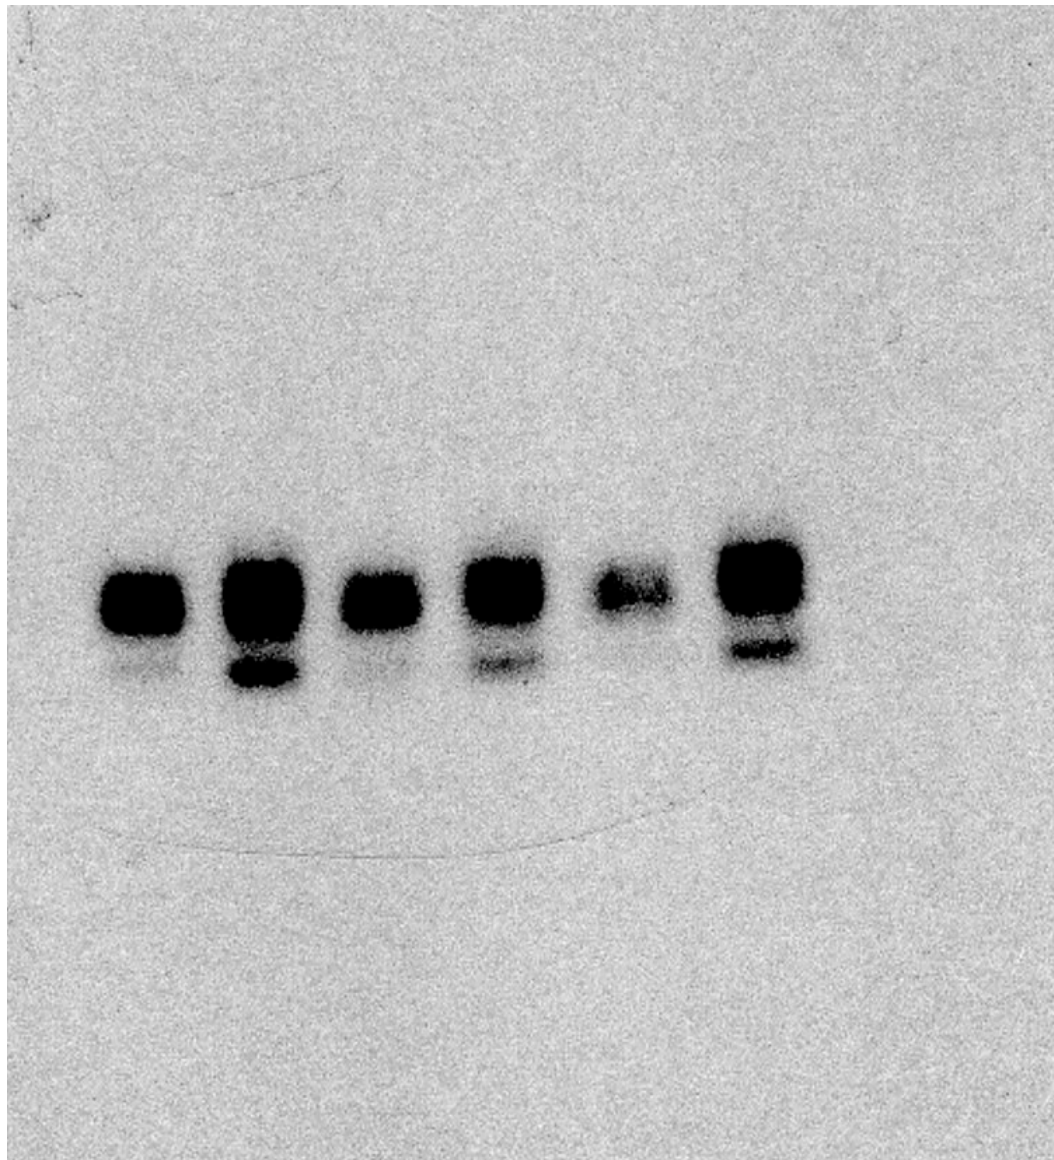

**Supplementary Figure S2: Uncut western blot gel for Figure 6, showing Baf upregulating PD-L1 on three different donors.**
